# Supplementary material for: Structure and dynamics of high-temperature strontium aluminosilicate melts
Source: Royal Society of Chemistry journal article supplement (doi:10.1039/c8cp04908d), 2018-01-01
Supplement: c8cp04908d1.pdf [file c8cp04908d1.pdf]

# Structure and Dynamics of High-Temperature Strontium Aluminosilicate Melts

*Pierre Florian<sup>1,\*</sup>, Alexey Novikov<sup>1,2</sup>, James Drewitt<sup>3</sup>, Louis Hennet<sup>1</sup>, Vincent Sarou-Kanian<sup>1</sup>,  
Dominique Massiot<sup>1</sup>, Henry E. Fischer<sup>3</sup> and Daniel R. Neuville<sup>2</sup>*

<sup>1</sup> CNRS, CEMHTI UPR3079, Université d'Orléans, F-45071 Orléans, France

<sup>2</sup> IPGP UMR7154 CNRS, Géomatériaux, Paris Sorbonne Cité, 75005 Paris, France

<sup>3</sup> School of Earth Sciences, University of Bristol, Bristol, BS8 1RJ, UK

<sup>4</sup> Institut Laue-Langevin, 71 avenue des Martyrs, CS 20156, 38042 Grenoble cedex 9, France

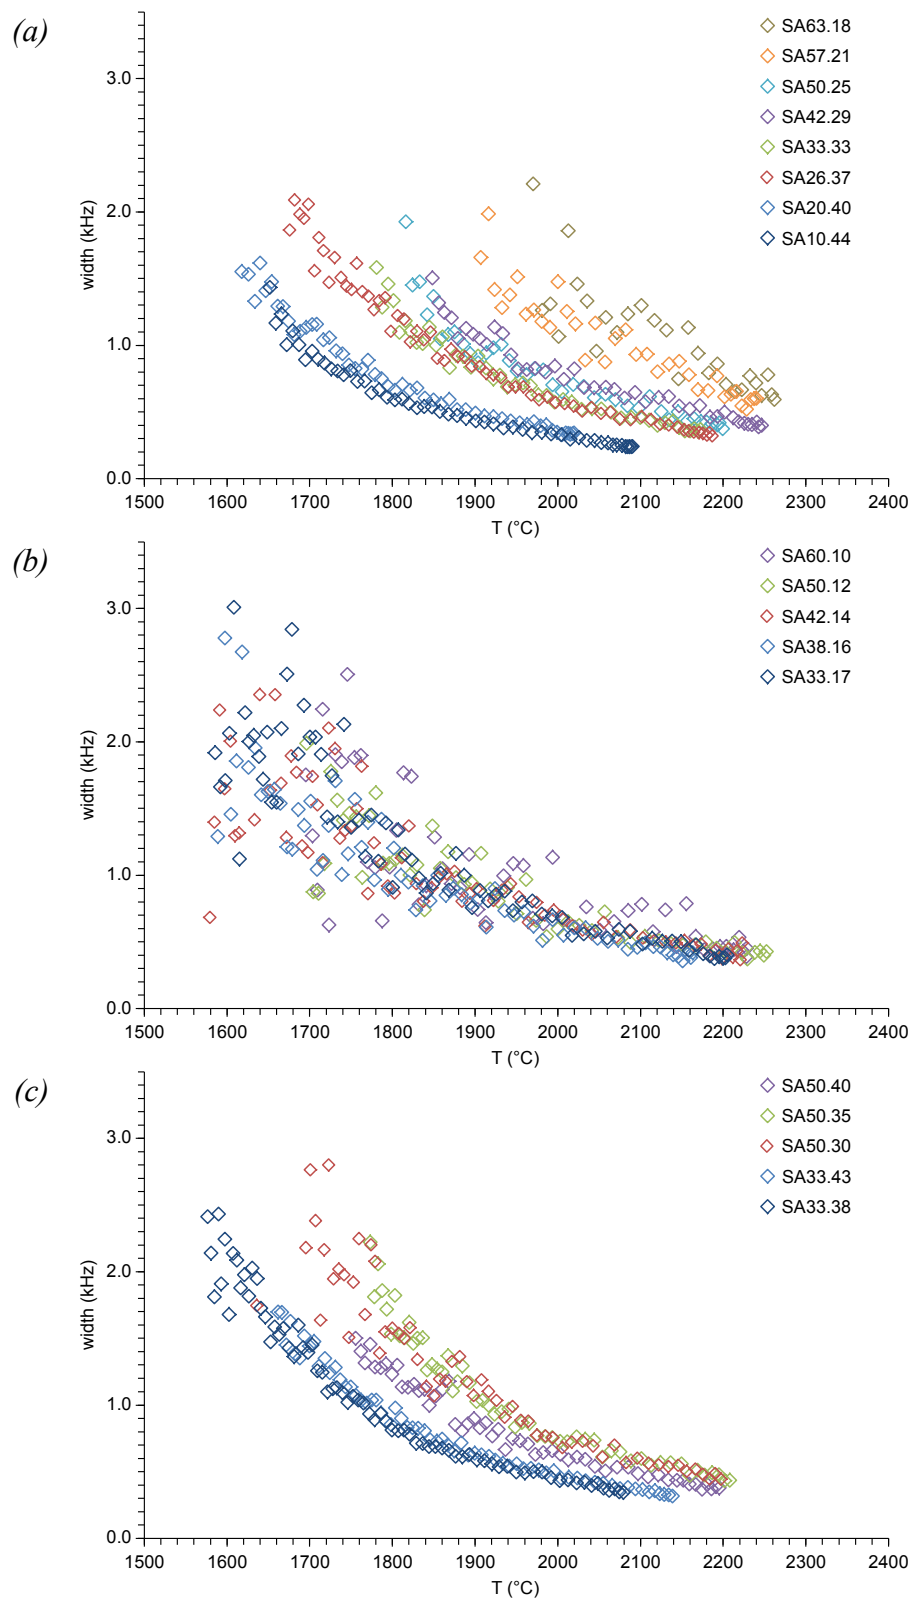

Figure S1. Evolution of the  $^{27}\text{Al}$  NMR line width during free cooling of all compositions studied: (a) on the charge-compensation line ( $R = 1$ ), (b) in the per-alkaline field ( $R = 3$ ) and (c) in the per-aluminous region ( $R < 1$ ).

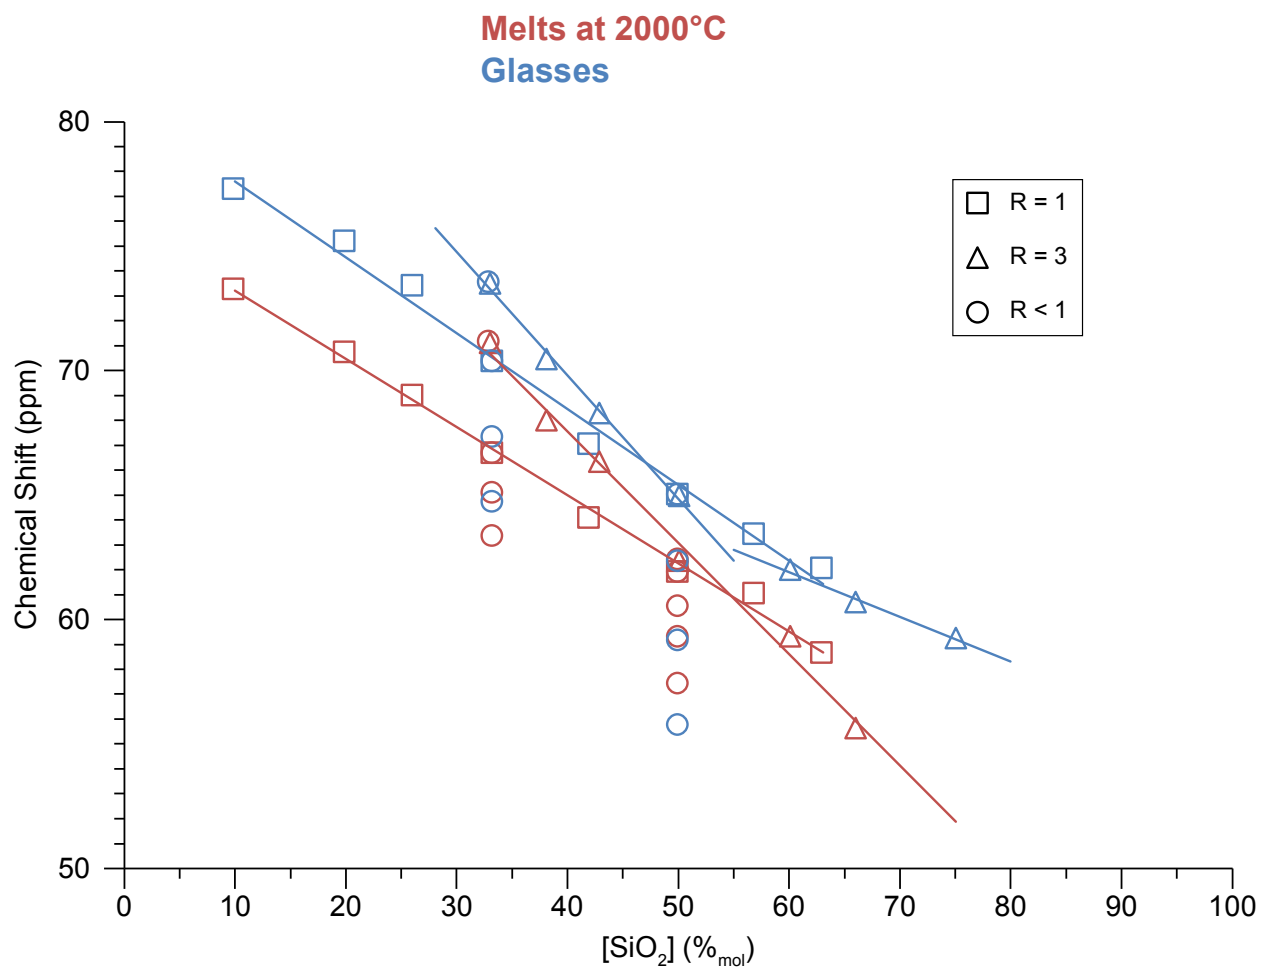

Figure S2. <sup>27</sup>Al chemical shifts at 2000°C  $\delta_{2000^\circ\text{C}}$  (red) and “barycenter” of the glass spectra  $\langle\delta_{\text{iso}}\rangle_{\text{glass}}$  (see text for details) (blue) for R = 1 (rectangles), R = 3 (triangles) and R < 1 (circles) compositions all given as a function SiO<sub>2</sub> content. Continuous lines are linear fit.

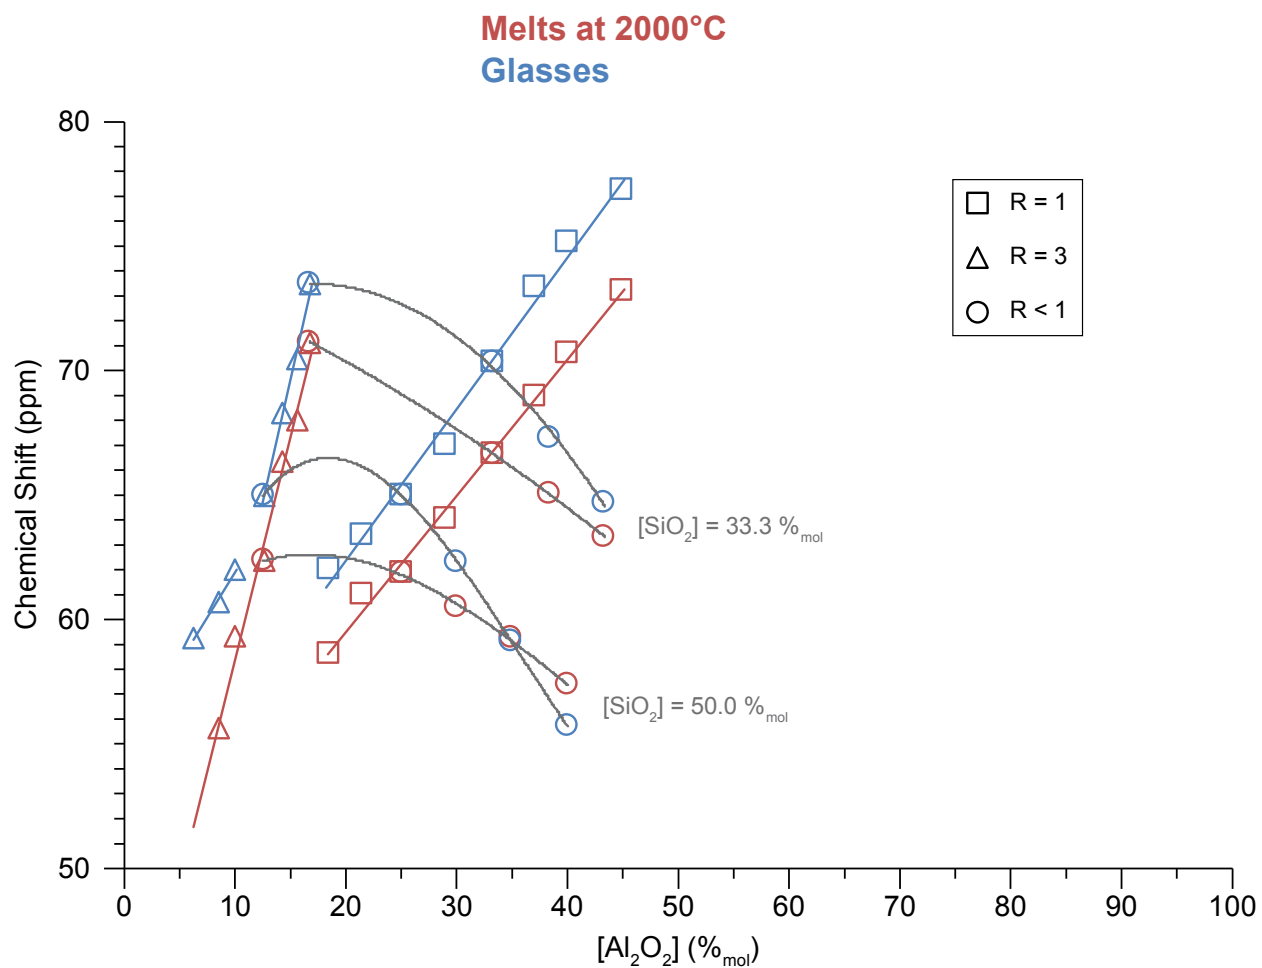

Figure S3. <sup>27</sup>Al chemical shifts at 2000°C  $\delta_{2000^\circ\text{C}}$  (red) and “barycenter” of the glass spectra  $\langle\delta_{\text{iso}}\rangle_{\text{glass}}$  (see text for details) (blue) for R = 1 (rectangles), R = 3 (triangles) and R < 1 (circles) compositions all given as a function SiO<sub>2</sub> content. Continuous lines are linear fit, grey lines are guides for the eyes for compositions at a given [SiO<sub>2</sub>].

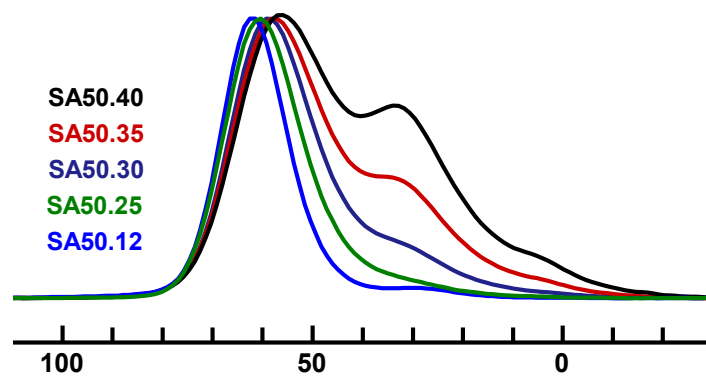

Figure S4. 27Al NMR MAS experiments (20.0 T) of peraluminous glasses.
